# Supplementary material
Source: publisher figshare collection journal article supplement (https://future-science-group.figshare.com/ndownloader/files/27978546)
Supplement: Supplementary file 1 [file 27978546]

# KEYNOTE-859: a Phase III study of pembrolizumab plus chemotherapy in gastric/gastroesophageal junction adenocarcinoma

## Authors

Josep Tabernero, Yung-Jue Bang, Eric Van Cutsem, Charles S. Fuchs, Yelena Yuriy Janjigian, Pooja Bhagia, Kan Li, David Adelberg, Shu Kui Qin

## Article URL

[www.futuremedicine.com/doi/10.2217/fo-2021-0176](http://www.futuremedicine.com/doi/10.2217/fo-2021-0176)

## Trial registration no:

NCT03675737

## Primary objectives

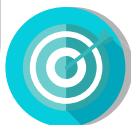

### Primary objective

To compare OS between pembrolizumab plus chemotherapy and placebo plus chemotherapy

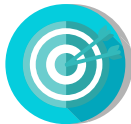

### Secondary key objectives

- To compare PFS assessed per RECIST v1.1 by BICR between pembrolizumab plus chemotherapy and placebo plus chemotherapy
- To compare DOR assessed per RECIST v1.1 by BICR between pembrolizumab plus chemotherapy and placebo plus chemotherapy
- To compare ORR assessed per RECIST v1.1 by BICR between pembrolizumab plus chemotherapy and placebo plus chemotherapy
- To evaluate the safety and tolerability of pembrolizumab plus chemotherapy and of placebo plus chemotherapy

## Study design & treatment

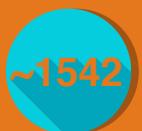

Planned sample size ~1542 patients

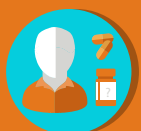

Randomized 1:1

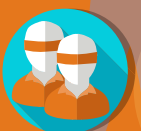

Double-blind

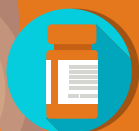

Placebo-controlled

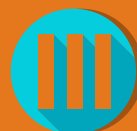

Phase III

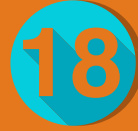

Age ≥18 years

### Key eligibility criteria

- Histologically or cytologically confirmed locally advanced unresectable or metastatic gastric/GEJ adenocarcinoma
- Known PD-L1 status
- HER2-negative status
- Measurable disease per RECIST v1.1
- ECOG PS 0 or 1
- Available tumor tissue
- No prior treatment for advanced or metastatic gastric/GEJ cancer

### Stratification

- Geographic location
- PD-L1 CPS
- Chemotherapy regimen

R  
(1:1)

**Pembrolizumab**  
200 mg IV Q3W  
+  
Chemotherapy  
(FP or CAPOX)

**Placebo**  
Saline IV Q3W  
+  
Chemotherapy  
(FP or CAPOX)

### Treatment will continue until:

- Confirmed disease progression
- Unacceptable toxicity
- Investigator or patient decision to withdraw from the study
- Noncompliance with treatment or trial procedures
- Completion of 35 cycles of treatment (cisplatin or oxaliplatin treatment may be capped at 6 cycles per local standard)

## Outcome measures/end points

### Primary end point:

OS (defined as the time from randomization to death from any cause)

### Secondary end points:

PFS, ORR, DOR, safety and tolerability

### Exploratory end points:

HRQoL (assessed using EORTC QLQ-C30, EORTC QLQ-STO22, and EQ-5D-5L), PFS and ORR per iRECIST, and molecular biomarkers

## Glossary

BICR: Blinded independent central review; CAPOX: Capecitabine plus oxaliplatin; CPS: Combined positive score; DOR: Duration of response; ECOG PS: Eastern Cooperative Oncology Group performance status; EORTC QLQ-C30: European Organisation for the Research and Treatment of Cancer Quality of Life Questionnaire Core 30; EORTC QLQ-STO22: European Organisation for the Research and Treatment of Cancer Quality of Life Questionnaire-Stomach; EQ-5D-5L: EuroQol 5-dimension, 5-level; FP: 5-fluorouracil plus cisplatin; GEJ: Gastroesophageal junction; HER2: Human epidermal growth factor receptor 2; HRQoL: Health-related quality of life; iRECIST: modified RECIST version 1.1 for immune-based therapies; IV: Intravenously; ORR: Objective response rate; OS: Overall survival; PD-L1: Programmed death ligand 1; PFS: Progression-free survival; Q3W: Every 3 weeks; RECIST: Response Evaluation Criteria in Solid Tumors.
